1 **Original Article**

2

3 *Title page*

4 **Bubbles help in troubles: contrast-enhanced ultrasound (CEUS) as predictor of**  
5 **recurrence for TIA/stroke in low-grade internal carotid artery stenosis.**

6 *Francesca D’Auria*<sup>1\*</sup> *Danilo Flavio Santo*<sup>2\*</sup>

7

8 \*Authors equally contributed.

9

10 <sup>1</sup>Università degli Studi di Salerno, Cardiovascular Outpatients Clinic, Salerno, Italy.

11 <sup>2</sup>Santagostino Medical Center, Cardiovascular Outpatient Clinic, Milano, Italy.

12

13 **Keywords:** CEUS, TIA, stroke, carotid stenosis, ultrasound, Doppler, echography.

14

15

16

17

18

19

20

21

22

23

24

25

26

27

28

29

30 **Correspondence to:** Francesca D’Auria, MD PhD MBA - Cardiovascular Surgeon - Azienda  
31 Ospedaliera Universitaria OO.RR. San Giovanni di Dio e Ruggi d’Aragona, Cardiovascular Surgery  
32 Department, Via San Leonardo n. 1, 84131 Salerno, Italy. Mobile (+39) 333.724.6468 – email:  
33 f.dauria@hotmail.com.

NOTE: This preprint reports new research that has not been certified by peer review and should not be used to guide clinical practice.

34 ***Abstract***

35

36 ***Introduction***

37 Contrast-enhanced ultrasound (CEUS) allows to visualize atherosclerotic plaque neo-vessels which  
38 are the hallmark of carotid plaque instability.

39 ***Aim***

40 Aim of our prospective study was to check the correlation between carotid CEUS analysis and the  
41 recurrence of TIA/stroke in patients with a previous recent TIA/stroke and neurological impairment  
42 congruent with the vascular stenosis.

43 ***Materials and Methods***

44 From November 2021 to May 2023, 62 consecutive patients (mean age 73.8 +/- 12.2, female 51)  
45 with a TIA/stroke in the previous 30 days, underwent carotid ultrasound and carotid CEUS in  
46 outpatients setting after 10 days from the acute event. Inclusion criteria was one atherosclerotic  
47 plaque inside the internal carotid artery, congruent with symptoms, which was causing a stenosis  
48 less than 50% (low-grade stenosis). Carotid plaque neovascularization scoring method was: score 0:  
49 no visible microbubbles within the plaque (A); score 1: minimal microbubbles confined to  
50 periadventitial (B); and score 2: microbubbles present throughout the plaque core (C). During the  
51 six-month follow-up, we checked TIA/stroke recurrences. A multivariable logistic regression  
52 analysis was performed.

53 ***Results***

54 In our series, 22% of patients have CEUS score 0, 35% CEUS score 1, and 43% CEUS score 2. At  
55 six-month follow-up we found 21% TIA/stroke recurrences in CEUS score 2, despite of the  
56 ongoing best medical therapy as per guidelines. In Cox regression analysis, CEUS-detected  
57 neovascularization was independently associated with TIA/stroke recurrence (hazard ratio, 5.37;  
58 95% confidence interval, 1.36–2.31).

59 ***Conclusions***

60 Plaque neovascularization, detected by CEUS, is an independent predictor of TIA/stroke recurrence  
61 at six-month follow-up in patients with carotid atherosclerosis despite of low-grade stenosis.

62

63

64

65

66 Abstract word count: 250.

## 67 **Introduction**

68 International guidelines for carotid artery atherosclerosis surgical and/or endovascular treatment are  
69 clear and strictly related to patients' symptoms, the grade of vascular stenosis, and the measured  
70 velocity<sup>1-2</sup>. In case of not significant stenosis caused by soft plaque which may determine  
71 TIA/stroke and its recurrence due to embolism, surgeons are keen to remove it<sup>3</sup>. This prudential  
72 orientation may cause an overtreatment of patients. In regards of this perceived feeling of surgical  
73 overdo and aiming to move towards increasingly precise medicine, we started a prospective  
74 observational trial with the purpose to identify possible diagnostic strategy to better orient surgical  
75 decision making in this grey zone. To meet our commitment, reducing not only surgical  
76 overtreatment but also patients X-ray exposure, we find that Carotid Contrast-Enhanced Ultrasound  
77 (CEUS) may be the methods to adopt in our research program and we try to elaborate an image-  
78 based surgical decision score system. In fact, CEUS is an imaging technique that involves the use of  
79 contrast agents (e.g. saline solution bubble or sulphur hexafluoride solution) to enhance the  
80 visualization of blood flow within the carotid arteries using ultrasound technology. During a carotid  
81 CEUS procedure, the contrast agent is injected into the bloodstream. It highlights the blood vessels  
82 and improves the clarity of the ultrasound images. This allows to more accurately evaluate the  
83 structure and function of the carotid arteries, aiding in the diagnosis and management of conditions  
84 such as carotid artery disease and stroke risk assessment<sup>4-5</sup>.

85

## 86 **Material and Methods**

87 Aim of our prospective study was to check the correlation between carotid CEUS analysis and the  
88 recurrence of TIA/stroke in patients with a previous recent TIA/stroke and neurological impairment  
89 congruent with the vascular stenosis. From November 2021 to February 2023, 62 consecutive  
90 patients (mean age 73.8 +/- 12.2, female 51) with a TIA/stroke in the previous 30 days, underwent  
91 carotid ultrasound and carotid CEUS using intravenous 3 ml sulphur hexafluoride solution  
92 (SonoVue<sup>®</sup>) in outpatients setting after 10 days from the acute event. The demography of the  
93 population is summarized in Table 1. Inclusion criteria was one atherosclerotic plaque inside the  
94 internal carotid artery, congruent with symptoms, which was causing a stenosis less than 50% (low-  
95 grade stenosis), while exclusions criteria were history of cerebral vascular diseases; history of  
96 neurological disease; presence of infections, malignant tumours, cardiopulmonary dysfunction,  
97 hepatic dysfunction, kidney failure (any degree), respiratory failure; hyperechoic or uniformly  
98 hyperechoic plaque. We arbitrary established a carotid plaque neovascularization scoring method as  
99 it is presented in Figure 1. The score 0 means no visible microbubbles within the plaque (A); score

100 1 is when minimal microbubbles are confined to peri adventitial (B); and score 2 consists in  
101 microbubbles which are present throughout the plaque core (C). During the six-month we checked  
102 TIA/stroke recurrences. No one patient was lost at follow-up. A multivariable logistic regression  
103 analysis for ischemic stroke and recurrent TIA was performed checking correlation between  
104 TIA/stroke recurrence and gender, age, hypertension, hyperlipidaemia, diabetes (any type), chronic  
105 obstructive lung disease (COPD), smoke status (active or previous), obesity, stress, atrial  
106 fibrillation, plaque velocity (peak systolic velocity), internal carotid kinking, CEUS score 0, CEUS  
107 score 1, and CEUS score 2. Internal ethical committee approved the study and produced a specific  
108 informed consent form for patients. These study compliances with ethical standards; each patient  
109 signed the specific informed consent (in accordance with the Declaration of Helsinki) to be enrolled  
110 in this research and authorized to publish the data in anonymous mode for search purpose only. An  
111 additional informed consent for personal data collection, treatment, post processing analysis, and  
112 publishing purposes was collected and signed by each patient as per institutional internal ethical  
113 committee. No sponsor or external fund were used to conduct this independent search. Statistical  
114 analysis was performed using SPSS Statistics 17.0 software. Frequency and percentages (%) were  
115 used for categorical variables, whereas mean  $\pm$  SD were employed for continuous variables.  
116 Continuous variables were compared between three groups using the independent t test. Proportions  
117 were compared using the chi-square test. To determine the association between variables and  
118 ischemic stroke or recurrent TIA after TIA, a multivariate logistic regression analysis was  
119 performed. Receiver operation curve (ROC) was generated to examine the efficacy of the resulting  
120 model. The level of significance was set at P value < 0.05.

121

## 122 **Results**

123 In our series, 22% of patients have a CEUS score 0; 35% of patients have a CEUS score 1; and 43%  
124 of patients have a CEUS score 2. At six-month follow-up we found 21% TIA/stroke recurrences in  
125 CEUS score 2, despite of the ongoing best medical therapy as per guidelines.

126 The multivariable logistic regression analysis for ischemic stroke and recurrent TIA, shows that  
127 CEUS-detected neovascularization was independently associated with TIA/stroke recurrence  
128 (hazard ratio, 5.37; 95% confidence interval, 1.36–2.31), while no other considered factors appeared  
129 to be significant as predictors of recurrence TIA/stroke, as it is reported in Table 2.

130 The ROC of the multivariate logistic regression analysis model for CEUS 2 score is showed in  
131 Figure 2.

132

## 133 *Discussion*

134 Carotid CEUS is often used as a non-invasive alternative to other imaging techniques such as  
135 computed tomography angiography (CTA) and/or magnetic resonance angiography (MRA) for  
136 evaluating extra-cranial carotid artery disease<sup>6</sup>. It offers advantages such as real-time imaging, lack  
137 of ionizing radiation, and the ability to assess blood flow dynamics. Carotid plaque instability refers  
138 to a condition where the atherosclerotic plaque becomes particularly prone to rupture or erosion.  
139 When plaque becomes unstable, it can lead to the formation of blood clots (thrombosis) or  
140 embolism. These clots or particles can then travel to smaller blood vessels in the brain, leading to  
141 blockages and potentially causing a stroke or transient ischemic attack (TIA)<sup>3</sup>. Several factors  
142 contribute to carotid plaque instability, including the composition of the plaque because plaque that  
143 contains a large amount of soft, lipid-rich material is more prone to rupture than stable, calcified  
144 plaque. Other factors for instability are the plaque size and shape; in fact, large, irregularly shaped  
145 plaques are more likely to be unstable compared to smaller, smoother plaques. Underlying medical  
146 conditions like hypertension, diabetes, hyperlipidaemia, and smoking can contribute to plaque  
147 instability by promoting inflammation and atherosclerosis; finally, hemodynamic factors, due to  
148 turbulent blood flow, can increase stress on the plaque, potentially leading to its rupture<sup>7</sup>. All these  
149 factors entered in our propensity score and Cox regression analysis, as reported in Table 2, but only  
150 CEUS-detected neovascularization was independently associated with TIA/stroke recurrence  
151 (hazard ratio, 5.37; 95% confidence interval, 1.36–2.31). Identifying carotid plaque instability is  
152 important because it indicates an increased risk of stroke or other cardiovascular events. Imaging  
153 techniques such as ultrasound, MRA or CTA can help assess plaque stability by evaluating plaque  
154 composition, size, and characteristics<sup>8</sup>. Management of carotid plaque instability typically involves  
155 aggressive risk factor modification, including lifestyle changes (such as diet, exercise, and smoking  
156 cessation) and medications such as statins, single (or double antiplatelet agents), and/or  
157 anticoagulants to stabilize the plaque and reduce the risk of thrombosis and/or embolism. In some  
158 cases, surgical intervention, such as carotid endarterectomy or carotid artery stenting, may be  
159 considered to remove or stabilize the unstable plaque and restore proper blood flow. Atherosclerotic  
160 plaque vascularization, also known as neovascularization, refers to the formation of new blood  
161 vessels within or around an atherosclerotic plaque. This process occurs in response to the  
162 inadequate blood supply to the growing plaque and the hypoxic conditions within it.  
163 Neovascularization is the body's attempt to supply oxygen and nutrients to the hypoxic areas within  
164 or around the plaque. However, the newly formed blood vessels are often fragile and leaky, leading  
165 to increased inflammation and plaque instability. Neovascularization is commonly observed in

166 advanced atherosclerosis and is associated with vulnerable plaques that have a higher risk of rupture  
167 and causing cardiovascular events such as heart attack or stroke. Detecting neovascularization  
168 within atherosclerotic plaques can be challenging but can be achieved through advanced imaging  
169 techniques such as contrast-enhanced ultrasound, MRA or CTA<sup>9</sup>. These imaging examinations are  
170 expensive and time consuming. In case of CTA, it exposes patients to X ray, on the other side,  
171 MRA identifying neovascularization within plaques may help in risk assessment and guiding  
172 treatment decisions in individuals with advanced atherosclerosis but it is not adoptable for each  
173 patient (e.g. claustrophobia, intra-corporeal metal splinters, intra-corporeal device not MR  
174 compatible). Transient ischemic attack (TIA) can occur in individuals with low-grade carotid artery  
175 stenosis, although the risk is generally lower compared to cases of more severe stenosis. In low-  
176 grade carotid artery stenosis, the narrowing of the artery is typically less than 50%<sup>10</sup>. It is essential  
177 to recognize that even low-grade stenosis can contribute to TIA under certain circumstances, first of  
178 all plaque vulnerability<sup>11</sup>. In our study, presence of minimal microbubbles which are confined to  
179 peri adventitial zone and microbubbles throughout the plaque core are predictive risk factors for  
180 TIA/stroke. The absence of microbubble was not related to TIA/stroke recurrence and the best  
181 medical therapy (statin, antihypertensive drugs, and single antiplatelet) was enough efficient to  
182 prevent further neurological episode overtime<sup>12</sup>.

183

## 184 ***Conclusions***

185 Plaque neovascularization, detected by CEUS, is an independent predictor of TIA/stroke recurrence  
186 at six-month follow-up in patients with carotid atherosclerosis despite of low-grade stenosis. This  
187 finding may guide in the decision between medical therapy and surgical/interventional treatment in  
188 the decision making and management of low-grade carotid artery stenosis which is symptomatic for  
189 single episode of TIA/stroke. These preliminary data need to be confirmed by large sample of  
190 patients and a more longer follow-up period.

191

## 192 ***References***

- 193 1. Naylor AR, Ricco JB, de Borst GJ, Debus S, de Haro J, Halliday A, Hamilton G, Kakisis J,  
194 Kakkos S, Lepidi S, Markus HS, McCabe DJ, Roy J, Sillesen H, van den Berg JC, Vermassen  
195 F, Esvs Guidelines Committee, Kolh P, Chakfe N, Hinchliffe RJ, Koncar I, Lindholt JS, Vega  
196 de Ceniga M, Verzini F, Esvs Guideline Reviewers, Archie J, Bellmunt S, Chaudhuri A,  
197 Koelemay M, Lindahl AK, Padberg F, Venermo M. Editor's Choice - Management of  
198 Atherosclerotic Carotid and Vertebral Artery Disease: 2017 Clinical Practice Guidelines of the

- 199 European Society for Vascular Surgery (ESVS). *Eur J Vasc Endovasc Surg*. 2018 Jan;55(1):3-  
200 81. doi: 10.1016/j.ejvs.2017.06.021. Epub 2017 Aug 26.
- 201 2. Zeebregts CJ, Paraskevas KI. The New 2023 European Society for Vascular Surgery (ESVS)  
202 Carotid Guidelines - The European Perspective. *Eur J Vasc Endovasc Surg*. 2023 Jan;65(1):3-4.  
203 doi: 10.1016/j.ejvs.2022.04.033. Epub 2022 May 6. PMID: 35533843
- 204 3. Bonati LH, Kakkos S, Berkefeld J, de Borst GJ, Bulbulia R, Halliday A, van Herzelee I, Koncar  
205 I, McCabe DJ, Lal A, Ricco JB, Ringleb P, Taylor-Rowan M, Eckstein HH. European Stroke  
206 Organisation guideline on endarterectomy and stenting for carotid artery stenosis. *Eur Stroke J*.  
207 2021 Jun;6(2):I-XLVII. doi: 10.1177/23969873211012121. Epub 2021 May 11. PMID:  
208 34414302
- 209 4. Brinjikji W, Huston J 3rd, Rabinstein AA, Kim GM, Lerman A, Lanzino G. *J Neurosurg*.  
210 Contemporary carotid imaging: from degree of stenosis to plaque vulnerability. 2016  
211 Jan;124(1):27-42. doi: 10.3171/2015.1.JNS142452. Epub 2015 Jul 31. PMID: 26230478  
212 Review.
- 213 5. Li Z, Xu X, Ren L, Shao Y, Luo S, Chen S, Guan X. Prospective Study About the Relationship  
214 Between CEUS of Carotid Intraplaque Neovascularization and Ischemic Stroke in TIA Patients.  
215 *Front Pharmacol*. 2019 Jun 21;10:672. doi: 10.3389/fphar.2019.00672. eCollection 2019.  
216 PMID: 31281254.
- 217 6. Zhu C, Li Z, Ju Y, Zhao X. Detection of Carotid Webs by CT Angiography, High-Resolution  
218 MRI, and Ultrasound. *J Neuroimaging*. 2021 Jan;31(1):71-75. doi: 10.1111/jon.12784. Epub  
219 2020 Sep 28. PMID: 32986890.
- 220 7. Ignatyev IM, Gafurov MR, Krivosheeva NV. Criteria for Carotid Atherosclerotic Plaque  
221 Instability. *Ann Vasc Surg*. 2021 Apr;72:340-349. doi: 10.1016/j.avsg.2020.08.145. Epub 2020  
222 Sep 11. PMID: 32927044.
- 223 8. Rotzinger DC, Qanadli SD, Fahrni G. Imaging the Vulnerable Carotid Plaque with CT: Caveats  
224 to Consider. Comment on Wang et al. Identification Markers of Carotid Vulnerable Plaques: An  
225 Update. *Biomolecules* 2022, 12, 1192. *Biomolecules*. 2023 Feb 20;13(2):397. doi:  
226 10.3390/biom13020397. PMID: 36830766.
- 227 9. Huang R, Abdelmoneim SS, Ball CA, Nhola LF, Farrell AM, Feinstein S, Mulvagh SL.  
228 Detection of Carotid Atherosclerotic Plaque Neovascularization Using Contrast Enhanced  
229 Ultrasound: A Systematic Review and Meta-Analysis of Diagnostic Accuracy Studies. *J Am  
230 Soc Echocardiogr*. 2016 Jun;29(6):491-502. doi: 10.1016/j.echo.2016.02.012. Epub 2016 Mar  
231 30. PMID: 27038513 Review.

- 232 10. Li F, Gu SY, Zhang LN, Chen J, Yao MH, Wu TT, Ma J, Jia CX, Wu R. Carotid plaque score  
233 and ischemic stroke risk stratification through a combination of B-mode and contrast-enhanced  
234 ultrasound in patients with low and intermediate carotid stenosis. *Front Cardiovasc Med*. 2023  
235 Dec 18;10:1209855. doi: 10.3389/fcvm.2023.1209855. eCollection 2023. PMID: 38179504.
- 236 11. Rerkasem A, Orrapin S, Howard DP, Rerkasem K. Carotid endarterectomy for symptomatic  
237 carotid stenosis. *Cochrane Database Syst Rev*. 2020 Sep 12;9(9):CD001081. doi:  
238 10.1002/14651858.CD001081.pub4. PMID: 32918282
- 239 12. Magnoni M, Ammirati E, Moroni F, Norata GD, Camici PG. Impact of Cardiovascular Risk  
240 Factors and Pharmacologic Treatments on Carotid Intraplaque Neovascularization Detected by  
241 Contrast-Enhanced Ultrasound. *J Am Soc Echocardiogr*. 2019 Jan;32(1):113-120.e6. doi:  
242 10.1016/j.echo.2018.09.001. Epub 2018 Oct 16. PMID: 30340893.

243

244

245

246

247

248

249

250

251

252

253

254

255

256

257

258

259

260

261

262

263

264 Main text word count: 2110.



265 **Tables**

| <i>Variable</i>     | <i>N (%) / Mean ± SD</i> | <i>Variable</i>                      | <i>N (%) / Mean ± SD</i> |
|---------------------|--------------------------|--------------------------------------|--------------------------|
| Female              | 51 (82)                  | Antiplatelet therapy                 | 60 (97)                  |
| Male                | 11 (18)                  | Antihypertensive therapy             | 62 (97)                  |
| Age                 | 73.8 +/- 12.2            | Statin                               | 58 (94)                  |
| Hypertension        | 60 (97)                  | New Oral Anticoagulant               | 22 (35)                  |
| Hyperlipidaemia     | 58 (94)                  | Atrial fibrillation                  | 8 (13)                   |
| Diabetes (any type) | 24 (39)                  | Coronary artery disease              | 2 (3)                    |
| COPD                | 21 (34)                  | Peripheral artery disease            | 14 (23)                  |
| Active smoker       | 41 (66)                  | Internal carotid artery stenosis (%) | 52 +/- 10                |
| Previous smoker     | 21 (34)                  | Peak systolic velocity (cm/s)        | 162 +/- 104              |
| Stress              | 32 (52)                  | End diastolic velocity (cm/s)        | 62 +/- 12                |

266 Table 1. Patients' demography.

| <i>Variable</i>     | <i>P value</i> | <i>Hazard Ratio</i> | <i>Confidence Interval 95%</i> |
|---------------------|----------------|---------------------|--------------------------------|
| Female              | 0.21           | 0.07                | 0.67 – 0.87                    |
| Male                | 0.11           | 0.04                | 0.57 – 0.98                    |
| Age                 | 0.89           | 0.02                | 0.76 – 0.89                    |
| Hypertension        | 0.98           | 0.32                | 0.57 – 0.98                    |
| Hyperlipidaemia     | 0.92           | 1.2                 | 0.26 – 0.29                    |
| Diabetes (any type) | 0.76           | 1.8                 | 0.76 – 0.89                    |
| COPD                | 0.09           | 0.5                 | 0.06 – 0.89                    |
| Active smoker       | 0.78           | 0.7                 | 0.23 – 9.87                    |
| Previous smoker     | 0.43           | 0.3                 | 0.57 - 12.48                   |
| Obesity             | 0.08           | 1.3                 | 0.05 - 11.28                   |
| Stress              | 0.68           | 0.2                 | 0.26 – 0.98                    |

|                        |              |             |                  |
|------------------------|--------------|-------------|------------------|
| Atrial fibrillation    | 0.89         | 1.8         | 0.76 – 0.89      |
| Peak systolic velocity | 0.25         | 1.98        | 0.22 – 0.34      |
| Vessel kinking         | 0.82         | 1.72        | 0.52 - 9.48      |
| CEUS score 0           | 0.23         | 1.02        | 0.21 – 1.28      |
| CEUS score 1           | 0.08         | 1.32        | 1.28-1.98        |
| <b>CEUS score 2</b>    | <b>0.002</b> | <b>5.37</b> | <b>1.36–2.31</b> |

267 Table 2. Multivariable logistic regression analysis for ischemic stroke/TIA recurrence.

268

269

270

271

272

273

274

275

276

277

278

279

280

281

282

283

284

285

286

287

288

289

290

291

292

293

294 **Figure legend**

295 Figure 1. Carotid plaque neovascularization scoring: score 0: no visible microbubbles within the  
296 plaque (A); score 1: minimal microbubbles confined to periadventitial (B); and score 2:  
297 microbubbles present throughout the plaque core (C).

298 Figure 2. Receiver operation curve (ROC) of the multivariate logistic regression analysis model  
299 (CEUS 1, CEUS 2 score).

300

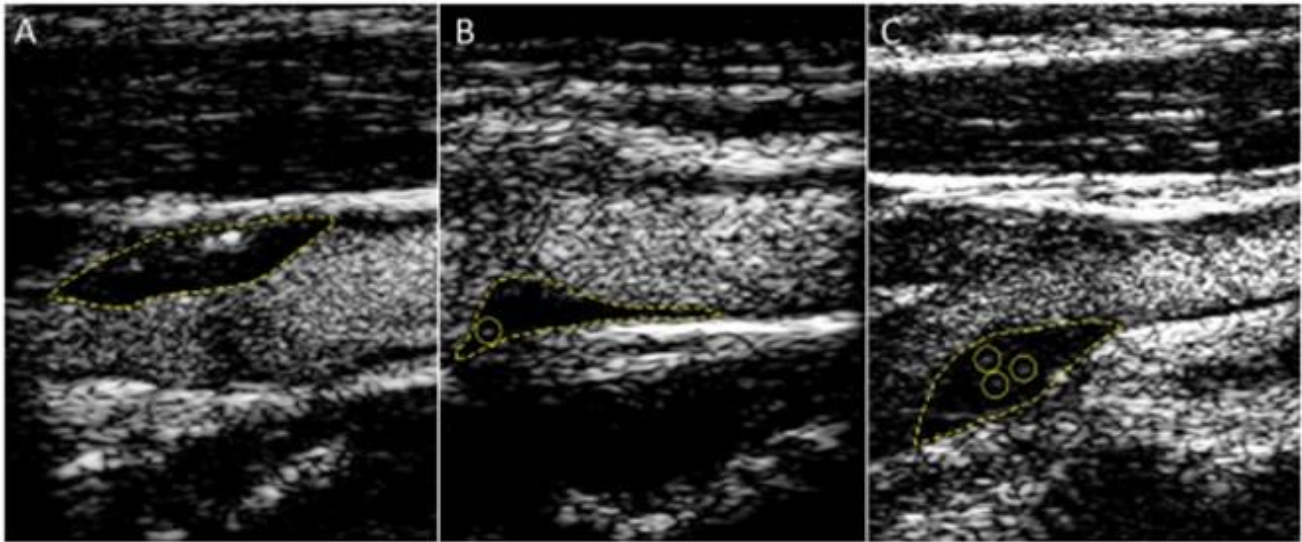

301

302 Figure 1. Carotid plaque neovascularization scoring: score 0: no visible microbubbles within the  
303 plaque (A); score 1: minimal microbubbles confined to periadventitial (B); and score 2:  
304 microbubbles present throughout the plaque core (C).

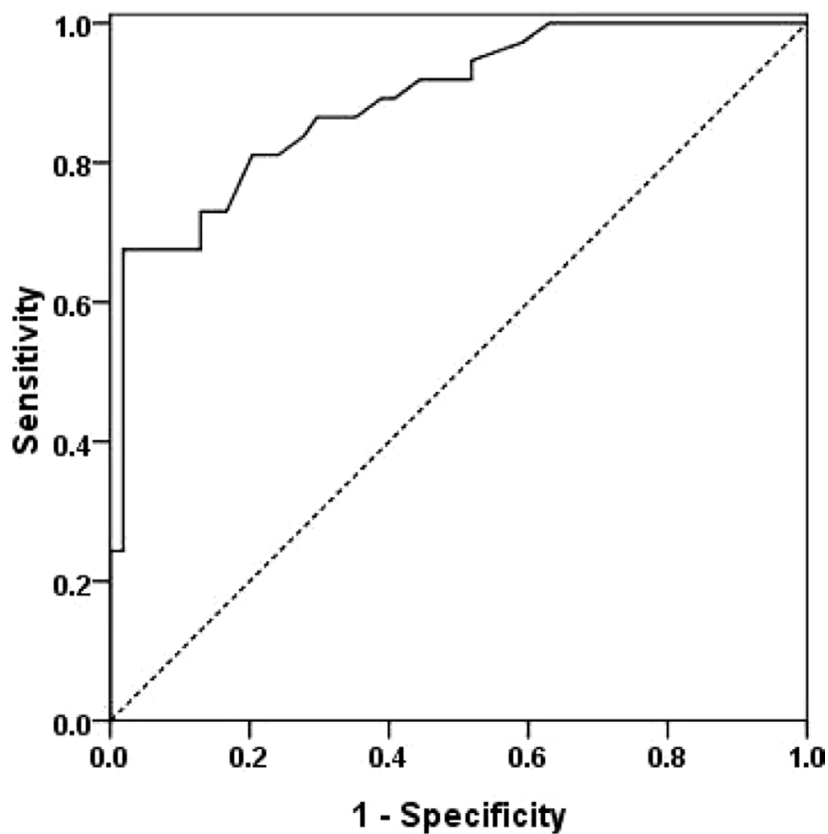

305

306 Figure 2. Receiver operation curve (ROC) of the multivariate logistic regression analysis model for  
307 CEUS2 score.

308

309 *Financial support and sponsorship*

310 None

311

312 *Conflicts of interest*

313 None

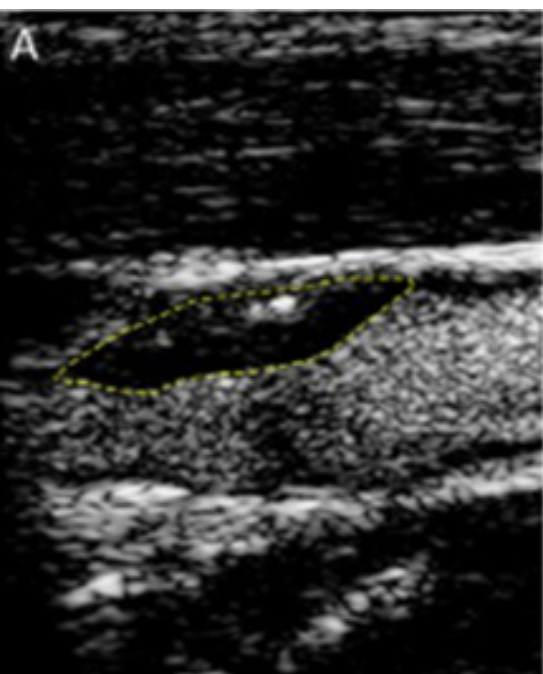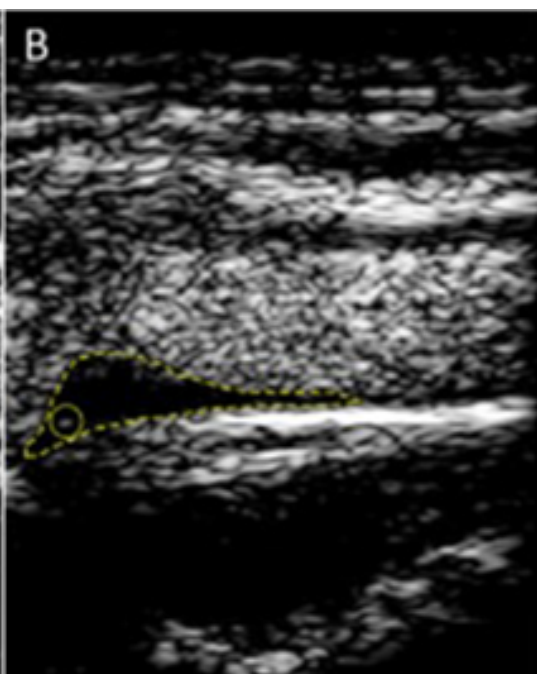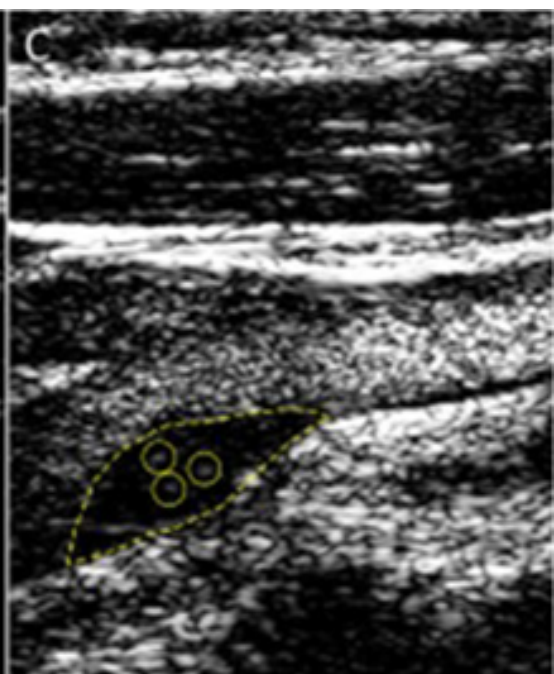

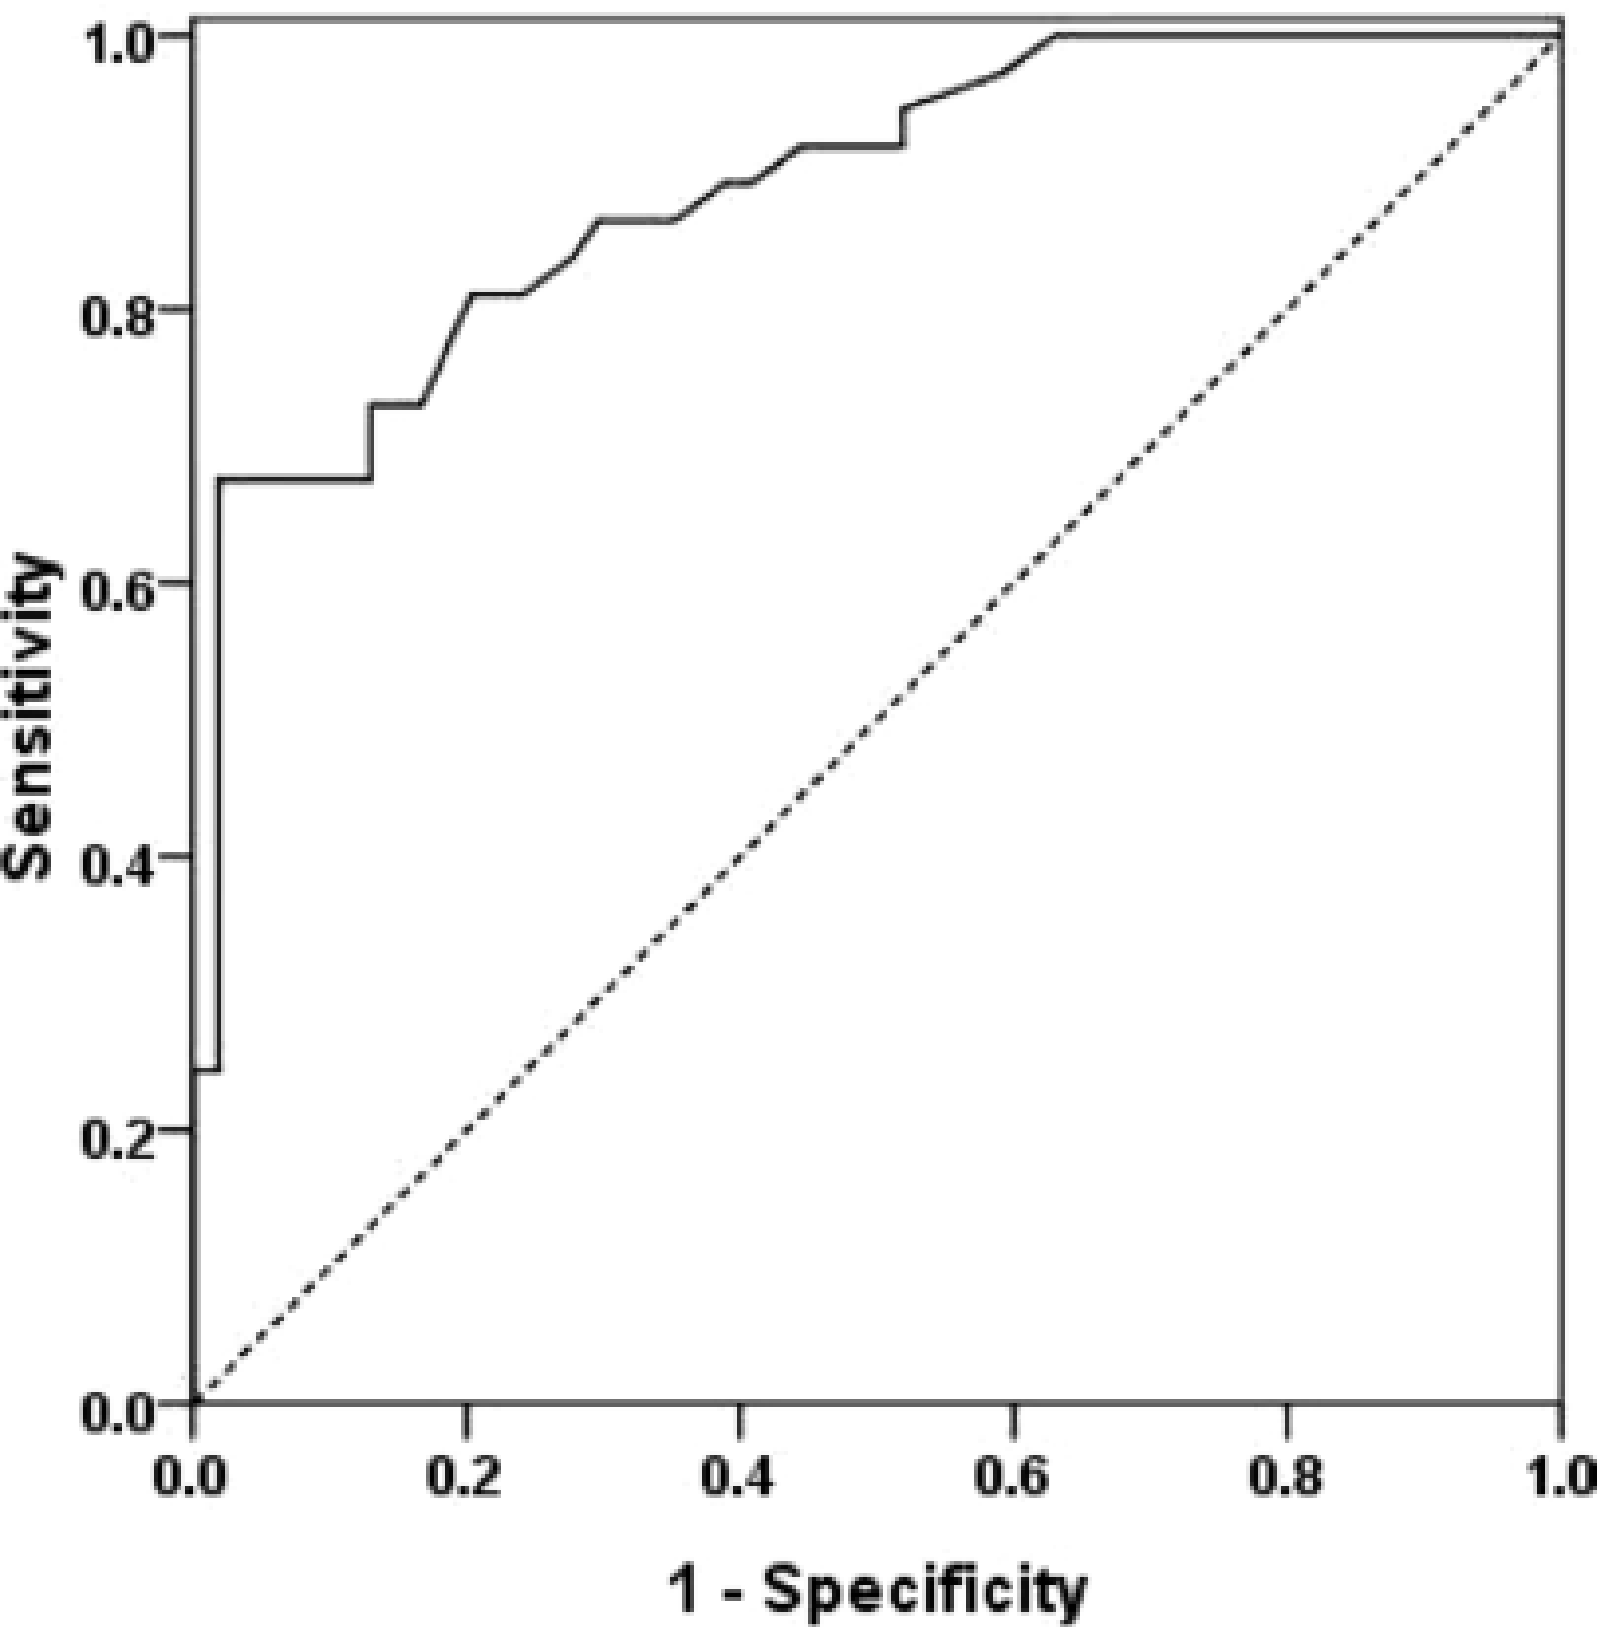

Source: https://medrxiv.org/content/10.1101/2024.04.17.24306003v1.full.pdf
